# Supplementary material
Source: PubMed Central journal article supplement (PMC8268075)

## Supplementary Material

Supplementary Table I. Baseline demographics in patients included versus excluded from our cohort

| Variable                                             | Include<br>(n=3,941) | Excluded<br>(n=940) | p value* |
|------------------------------------------------------|----------------------|---------------------|----------|
| Age                                                  | 64.6±13.0            | 64.6±13.9           | 0.894    |
| Male sex                                             | 2,196 (55.7%)        | 490 (52.1%)         | 0.047    |
| Race                                                 |                      |                     |          |
| White                                                | 2,924 (74.2%)        | 631 (67.1%)         | <0.001   |
| Black                                                | 739 (18.8%)          | 227 (24.1%)         |          |
| Asian                                                | 119 (3.0%)           | 25 (2.7%)           |          |
| Other                                                | 159 (4.0%)           | 57 (6.1%)           |          |
| Hispanic ethnicity                                   | 278 (7.1%)           | 109 (11.6%)         | <0.001   |
| Final diagnosis of infarct<br>(n=4,876)              | 1,498 (38.1%)        | 295 (31.4%)         | <0.001   |
| Hypertension<br>(n=4,860)                            | 2,708 (69.0%)        | 665 (71.1%)         | 0.204    |
| Diabetes<br>(n=4,872)                                | 1,050 (26.7%)        | 290 (30.9%)         | 0.010    |
| Atrial fibrillation<br>(n=4,867)                     | 37 (0.9%)            | 12 (1.3%)           | 0.348    |
| Coronary artery disease<br>(n=4,869)                 | 397 (10.1%)          | 100 (10.7%)         | 0.601    |
| Congestive heart failure<br>(n=4,874)                | 99 (2.5%)            | 27 (2.9%)           | 0.525    |
| Statin at 7 days from<br>randomization (n=4,744)     | 3,107 (79.4%)        | 649 (77.9%)         | 0.323    |
| Smoking status (n=4,877)                             |                      |                     |          |
| Never                                                | 2,055 (52.2%)        | 486 (51.9%)         | 0.679    |
| Past                                                 | 1,083 (27.5%)        | 249 (26.6%)         |          |
| Current                                              | 802 (20.3%)          | 202 (21.6%)         |          |
| NIH Stroke Scale at<br>randomization (n=3,484)       | 1, 0-2               | 1, 0-2              | 0.287    |
| First measured systolic blood<br>pressure (n=4,877)  | 161.8±27.5           | 161.3±28.4          | 0.673    |
| First measured diastolic blood<br>pressure (n=4,877) | 88.1±16.8            | 87.7±17.7           | 0.510    |
| Baseline glucose (n=4,878)                           | 130.2±60.4           | 131.9±62.2          | 0.452    |
| Clopidogrel treatment arm                            | 1,969 (50.0%)        | 463 (49.3%)         | 0.697    |

\* Binary variables presented as n (%); ordinal variables as median, IQR; interval variables as mean±standard deviation. P values calculated with the chi-squared test for binary variables, the Wilcoxon rank sum test for ordinal variables, and Student's t-test for interval variables.

**Supplementary Table II.** Multivariate Coxmodel fit to the outcome of ischemic stroke during follow-up.

| <b>Variable</b>                          | <b>Hazard Ratio</b> | <b>95% CI</b> | <b>p value</b> |
|------------------------------------------|---------------------|---------------|----------------|
| Age                                      | 1.01                | 1.00-1.02     | 0.069          |
| Female sex                               | 1.02                | 0.77-1.36     | 0.889          |
| Race                                     |                     |               |                |
| White                                    | Ref                 | -             | -              |
| Black                                    | 1.73                | 1.24-2.41     | 0.001          |
| Asian                                    | 0.37                | 0.09-1.51     | 0.168          |
| Other                                    | 1.45                | 0.75-2.78     | 0.267          |
| Hispanic ethnicity                       | 0.68                | 0.34-1.34     | 0.264          |
| Acute stroke as index event              | 2.72                | 2.04-3.63     | <0.001         |
| Diabetes                                 | 1.45                | 1.08-1.95     | 0.015          |
| Hypertension                             | 1.26                | 0.89-1.78     | 0.200          |
| Smoking status                           |                     |               |                |
| Never                                    | Ref                 | -             | -              |
| Past                                     | 0.81                | 0.58-1.14     | 0.230          |
| Current                                  | 1.01                | 0.70-1.45     | 0.976          |
| Statin therapy at day 7                  | 1.36                | 0.90-2.05     | 0.143          |
| Clopidogrel treatment                    | 0.71                | 0.54-0.94     | 0.015          |
| Stenosis category                        |                     |               |                |
| <50%                                     | Ref                 | -             | -              |
| ≥50%                                     | 2.45                | 1.68-3.57     | <0.001         |
| Stenosis category and symptomatic status |                     |               |                |
| <50%                                     | Ref                 | -             | -              |
| ≥50% asymptomatic                        | 2.54                | 1.52-4.23     | <0.001         |
| ≥50% symptomatic                         | 3.50                | 2.06-5.98     | <0.001         |

## Supplementary Figure I. Study CONSORT

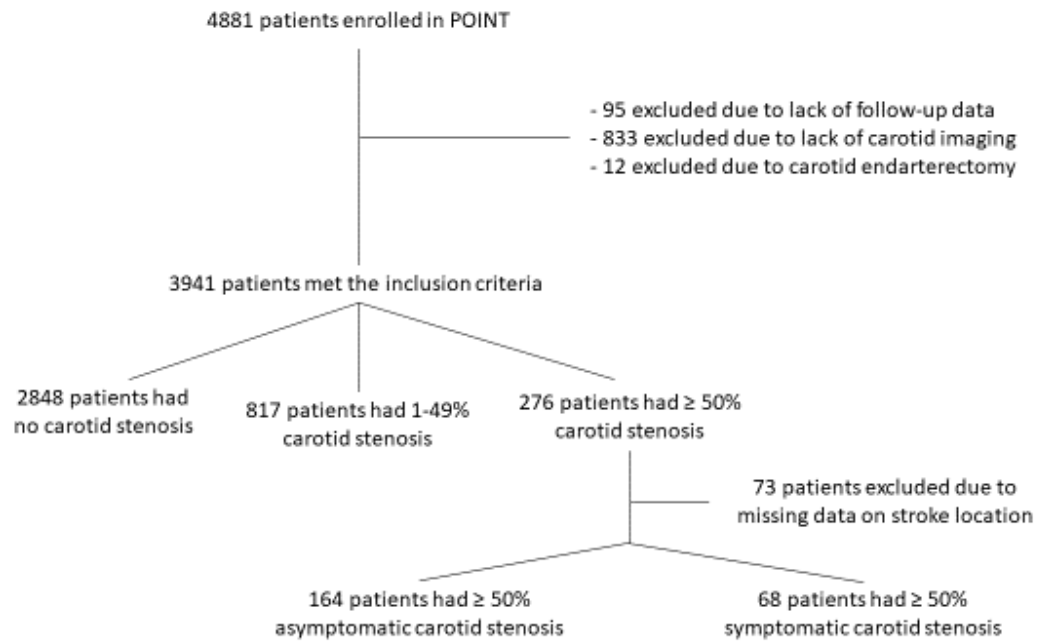

**Supplementary Figure II.** Kaplan-Meier curves for ischemic stroke events within 90 days, shown stratified by no stenosis, 1-49% stenosis, and  $\geq 50\%$ .

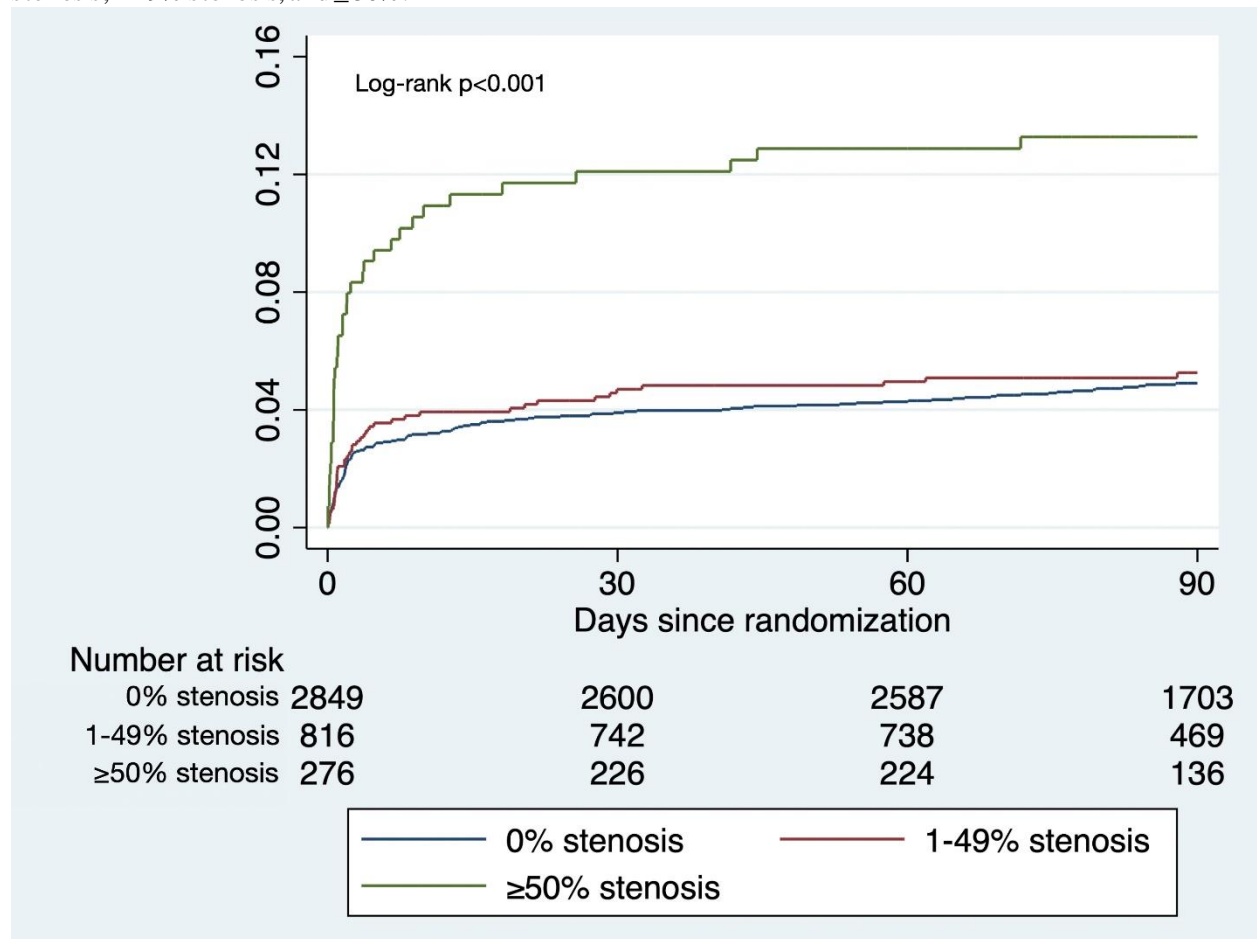

Supplement: NIHMS1710568-supplement-Supplemental_Materials.pdf [file NIHMS1710568-supplement-Supplemental_Materials.pdf]
